# Supplementary material
Source: Research Square preprint supplement (doi:10.21203/rs.3.rs-9700602/v1)
Supplement: Supplementary file 1 [file 7bfa13991f056e5894cd8d7a.docx]

**Supplementary Table S1.** Obesity-related complications in EASO-defined obesity

| EASO-defined obesity-related complications | |
| --- | --- |
| Hypertension | 1. Self-reported physician diagnosis of hypertension   (2) Systolic blood pressure ≥140 mmHg  (3) Diastolic blood pressure ≥90 mmHg  (4) Current use of antihypertensive medication |
| Cardiovascular disease | Self-reported physician diagnosis of stroke, angina, heart failure, or other heart disease |
| Arthritis | Self-reported physician diagnosis of arthritis |
| Kidney disease | Self-reported physician diagnosis of kidney disease |
| Lung disease | 1. Self-reported physician diagnosis of asthma   (2) Self-reported physician diagnosis of chronic lung disease |
| Type 2 diabetes | 1. Self-reported physician diagnosis of diabetes   (2) HbA1c ≥ 6.5%  (3) Fasting plasma glucose ≥ 7.0 mmol/L  (4) Self-reported use of glucose-lowering medication (including insulin) |
| Depressive symptoms | Depressive symptoms defined as CES-D score ≥ 4 |

Note: Hypertension, cardiovascular disease, lung disease, and type 2 diabetes were coded as present if any corresponding criterion was met. Depressive symptoms were assessed using the 8-item Center for Epidemiologic Studies Depression Scale (CES-D).

**Supplementary Table S2.** Generalized estimated equation examining the effect of EASO-defined obesity on longitudinal change of ADL/IADL scores by age and sex.

|  | | **ADL/IADL scores** | | | | | | | | | | | | |
| --- | --- | --- | --- | --- | --- | --- | --- | --- | --- | --- | --- | --- | --- | --- |
| **Age 50-64 years** | | | **Age ≥65 years** | | | **Male** | | | **Female** | | | |
| ***β*** | **95%CI** | ***P*** | ***β*** | **95%CI** | ***P*** | ***β*** | **95%CI** | ***P*** | ***β*** | **95%CI** | ***P*** |
| **EASO-defined obesity** |  |  |  |  |  |  |  |  |  |  |  |  |  |
|  | **Normal weight (ref.)** |  |  |  |  |  |  |  |  |  |  |  |  |
|  | EASO overweight | **-0.519** | **(-0.827, -0.210)** | **0.001** | **-0.665** | **(-0.991, -0.339)** | **<0.001** | -0.221 | (-0.598, 0.154) | 0.249 | **-0.486** | **(-0.784, -0.188)** | **0.001** |
|  | EASO new obesity | **0.646** | **(0.417, 0.874)** | **<0.001** | **0.263** | **(0.065, 0.460)** | **0.009** | **0.816** | **(0.551, 1.081)** | **<0.001** | **0.273** | **(0.077, 0.468)** | **0.006** |
|  | BMI obesity | **0.768** | **(0.555, 0.981)** | **<0.001** | **0.655** | **(0.458, 0.852)** | **<0.001** | **1.200** | **(0.929, 1.470)** | **<0.001** | **0.740** | **(0.559, 0.920)** | **<0.001** |
| **Time** |  | **0.077** | **(0.050, 0.104)** | **<0.001** | **0.261** | **(0.235, 0.286)** | **<0.001** | **0.266** | **(0.232, 0.299)** | **<0.001** | **0.141** | **(0.120, 0.162)** | **<0.001** |
| **EASO obesity × time** |  |  |  |  |  |  |  |  |  |  |  |  |  |
|  | EASO overweight × time | **0.061** | **(0.016, 0.107)** | **0.008** | 0.031 | (-0.019, 0.082) | 0.229 | -0.011 | (-0.067, 0.043) | 0.678 | 0.029 | (-0.012 0.072) | 0.172 |
|  | EASO new obesity× time | -0.015 | (-0.051, 0.020) | 0.401 | **-0.042** | **(-0.075, -0.009)** | **0.011** | **-0.095** | **(-0.136, -0.054)** | **<0.001** | -0.006 | (-0.035, 0.023) | 0.682 |
|  | BMI obesity × time | -0.008 | (-0.041, 0.024) | 0.581 | **-0.085** | **(-0.118, -0.052)** | **<0.001** | **-0.133** | **(-0.175, -0.091)** | **<0.001** | **-0.034** | **(-0.061, -0.007)** | **0.012** |

Note: Models were adjusted for age, sex, marital status, education, smoking, alcohol intake, and physical activity.

**Supplementary Table S3.** Baseline characteristics of participants without functional

limitations by EASO-defined obesity (n=5,221)

| **Characteristic** | **Total**  **n= 5221** | **Normal weight**  **n= 1500** | **EASO overweight**  **n= 922** | **EASO new obesity**  **n = 1468** | **BMI obesity**  **n= 1331** | ***P*** |
| --- | --- | --- | --- | --- | --- | --- |
| Age, years, median (IQR) | 64(13) | 64(14) | 61(11) | 66 (14) | 62 (12) | **<0.001** |
| Sex, n (%) |  |  |  |  |  |  |
| Male | 2485 (47.6) | 606 (40.4) | 493 (53.5) | 791 (53.9) | 595 (44.7) | **<0.001** |
| Female | 2736 (52.4) | 894 (59.6) | 429 (46.5) | 677 (46.1) | 736 (55.3) |  |
| Marital status, % |  |  |  |  |  | **0.009** |
| Married | 3721 (71.3) | 967 (64.5) | 636 (69.0) | 913 (62.2) | 857 (64.4) |  |
| Unmarried | 1499 (28.7) | 532 (35.5) | 286 (31.0) | 555 (37.8) | 474 (35.6) |  |
| Educational level, % |  |  |  |  |  | **<0.001** |
| Low | 914 (23.6) | 239 (21.3) | 127 (17.8) | 251 (23.7) | 297 (30.3) |  |
| Intermediate | 1562 (40.3) | 458 (40.8) | 290 (40.6) | 440 (41.6) | 374 (38.2) |  |
| High | 1399 (36.1) | 425 (37.9) | 297 (41.6) | 368 (34.7) | 309 (31.5) |  |
| Smoking, % |  |  |  |  |  | **<0.001** |
| Current smoker | 690 (13.2) | 264 (17.6) | 106 (11.5) | 162 (11.1) | 158 (11.9) |  |
| Non-smoker | 4526(86.7) | 1234 (82.4) | 814 (88.5) | 1305 (88.9) | 1173 (88.1) |  |
| Alcohol intake, % |  |  |  |  |  | **<0.001** |
| Rarely | 722 (15.1) | 216 (15.6) | 102 (11.8) | 167 (12.6) | 237 (19.6) |  |
| Regularly | 2189 (45.7) | 591 (42.7) | 391 (45.2) | 609 (45.9) | 598 (49.3) |  |
| Frequently | 1877 (39.2) | 576 (41.6) | 372 (43.0) | 552 (41.6) | 377 (31.1) |  |
| Physical activity, % |  |  |  |  |  | **<0.001** |
| Inactive | 95 (1.8) | 29 (1.9) | 12 (1.3) | 27 (1.8) | 27 (2.0) |  |
| Low | 965 (18.5) | 244 (16.3) | 127 (13.8) | 279(19.0) | 315 (23.7) |  |
| Moderate | 2985 (57.2) | 817 (54.5) | 539 (58.5) | 873 (59.5) | 756 (56.8) |  |
| High | 1173 (22.5) | 408 (27.2) | 244 (26.5) | 289 (19.7) | 232 (17.5) |  |
| BMI, kg/m2 | 27.07(5.53) | 23.23 (2.24) | 27.02 (2.10) | 27.30 (2.29) | 32.34(3.81) | **<0.001** |
| Morbidity status, n (%) |  |  |  |  |  |  |
| Normal | 1833 (35.1) | 643 (42.9) | 877 (95.1) | 0 | 313 (23.5) |  |
| Morbid | 3388 (64.9) | 857 (57.1) | 45 (4.9) | 1468 (100.0) | 1018 (76.5) |  |
| WHtR | 0.57 (0.09) | 0.50 (0.05) | 0.56 (0.05) | 0.57 (0.05) | 0.64 (0.06) | **<0.001** |

**Supplementary Table S4.** Generalized estimated equation examining the effect of EASO-defined obesity on longitudinal change of ADL/IADL scores by time as a categorical variable

|  | | **ADL/IADL scores** | | |
| --- | --- | --- | --- | --- |
| ***β*** | **95%CI** | ***P*** |
| **EASO-defined obesity** |  |  |  |  |
|  | **Normal weight (ref.)** |  |  |  |
|  | EASO overweight | **-0.435** | **(-0.656, -0.214)** | **<0.001** |
|  | EASO new obesity | **0.407** | **(0.263, 0.552)** | **<0.001** |
|  | BMI obesity | **0.756** | **(0.615, 0.897)** | **<0.001** |
| **Time** |  |  |  |  |
|  | T2 | 0.016 | (-0.071, 0.104) | 0.717 |
|  | T3 | **0.168** | **(0.067, 0.269)** | **0.001** |
|  | T4 | **0.437** | **(0.330, 0.544)** | **<0.001** |
|  | T5 | **0.489** | **(0.368, 0.611)** | **<0.001** |
|  | T6 | **0.821** | **(0.702, 0.941)** | **<0.001** |
|  | T7 | **1.002** | **(0. 874, 1.134)** | **<0.001** |
|  | T8 | **1.244** | **(1.108, 1.380)** | **<0.001** |
| **EASO obesity × time** |  |  |  |  |
|  | EASO overweight × T2 | -0.022 | (-0.197, 0.152) | 0.804 |
|  | EASO new obesity× T2 | 0.005 | (-0.108, 0.119) | 0.920 |
|  | BMI obesity × T2 | 0.039 | (-0.070, 0.149) | 0.480 |
|  | EASO overweight × T3 | 0.049 | (-0.148, 0.247) | 0.623 |
|  | EASO new obesity× T3 | -0.073 | (-0.204, 0.057) | 0.269 |
|  | BMI obesity × T3 | -0.065 | (-0.192, 0.061) | 0.310 |
|  | **EASO overweight × T4** | **0.229** | **(0.023, 0.435)** | **0.029** |
|  | EASO new obesity× T4 | -0.138 | (-0.278, 0.001) | 0.052 |
|  | **BMI obesity × T4** | **-0.179** | **(-0.315, -0.044)** | **0.009** |
|  | **EASO overweight × T5** | **0.256** | **(0.025, 0.487)** | **0.029** |
|  | **EASO new obesity× T5** | **-0.233** | **(-0.393, -0.073)** | **0.004** |
|  | **BMI obesity × T5** | **-0.239** | **(-0.394, -0.084)** | **0.002** |
|  | EASO overweight × T6 | 0.121 | (-0.105, 0.348) | 0.294 |
|  | **EASO new obesity× T6** | **-0.203** | **(-0.361, -0.046)** | **0.011** |
|  | **BMI obesity × T6** | **-0.338** | **(-0.491, -0.185)** | **<0.001** |
|  | EASO overweight × T7 | 0.080 | (-0.160, 0.322) | 0.512 |
|  | EASO new obesity× T7 | -0.090 | (-0.258, 0.078) | 0.295 |
|  | **BMI obesity × T7** | **-0.328** | **(-0.492, -0.165)** | **<0.001** |
|  | EASO overweight × T8 | 0.158 | (-0.091, 0.408) | 0.213 |
|  | **EASO new obesity× T8** | **-0.205** | **(-0.385, -0.026)** | **0.025** |
|  | **BMI obesity × T8** | **-0.409** | **(-0.583, -0.234)** | **<0.001** |
| **Joint test: *χ2*interaction =** **79.60, *df* = 21, *P* <0.001** | | | | |

Note: Models were adjusted for age, sex, marital status, education levels, smoking, alcohol intake, and physical activity.

**Supplementary Table S5.** Associations of EASO-defined obesity with incident functional limitations: Cox models (exclude participants who experienced incident functional limitation in the previous two years of follow-up)

| Category | Sample (n, %) | HR (95% CI) | ***P*** |
| --- | --- | --- | --- |
| Normal weight | 1357（29.3%） | 1.00（reference） |  |
| EASO overweight | 873 (18.8%） | 0.93 (0.78,1.12) | 0.492 |
| EASO new obesity | 1274（27.5%） | **1.36 (1.17,1.58)** | **＜0.001** |
| BMI obesity | 1134（24.4%） | **1.50 (1.28,1.75)** | **＜0.001** |
